# Supplementary material for: Identifying QTLs for Grain Size in a Colossal Grain Rice (Oryza sativa L.) Line, and Analysis of Additive Effects of QTLs
Source: MDPI journal article supplement (doi:10.3390/ijms23073526), 2022-03-24
Supplement: s1 [file s1]

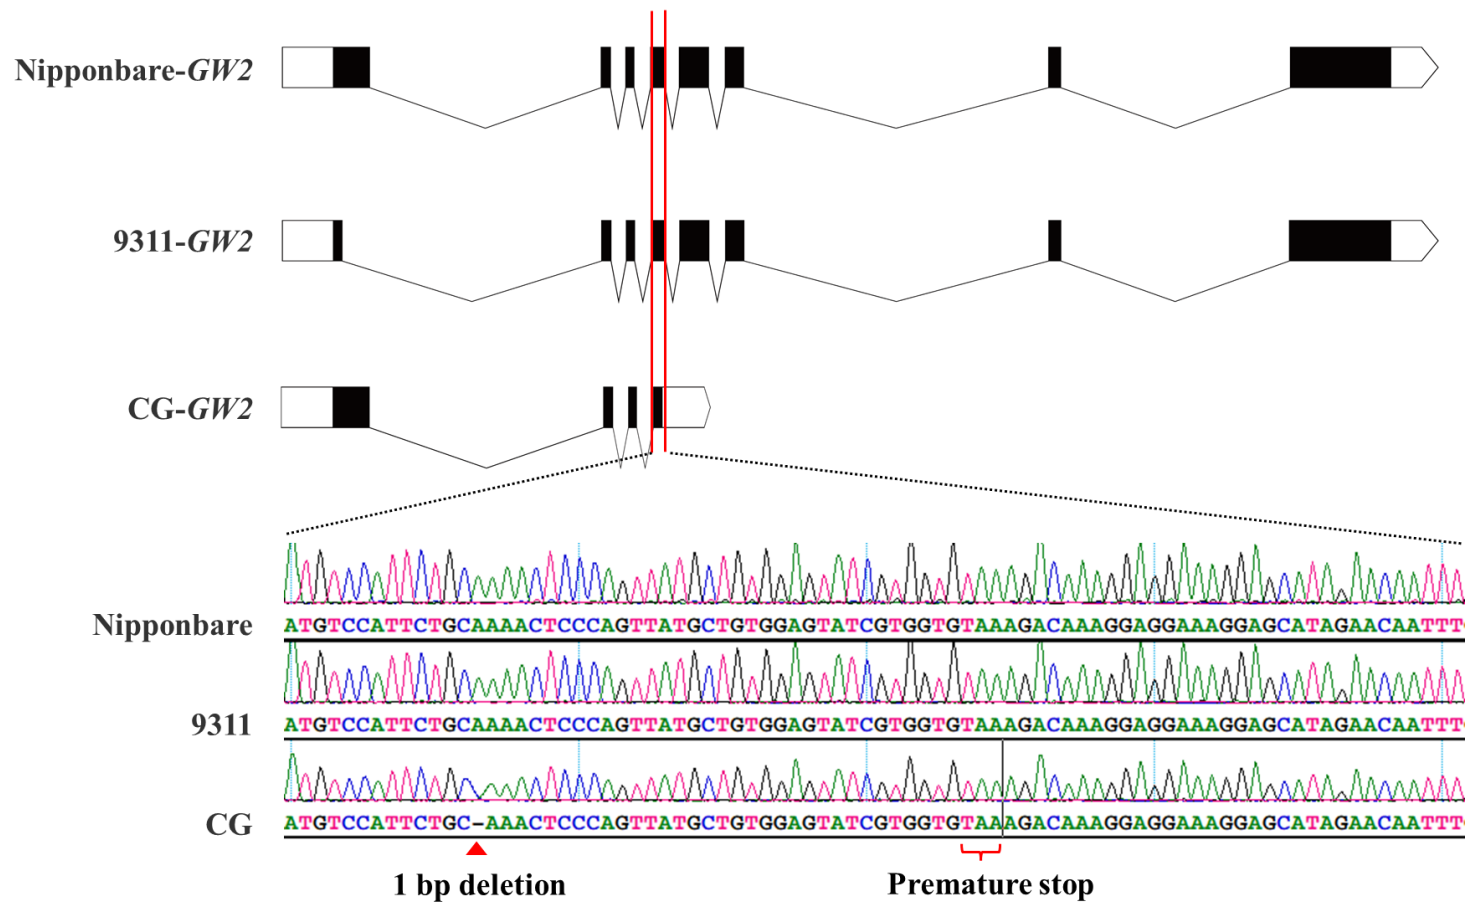

**Supplementary Fig. 1 Structure of GW2 and partial Sequence alignment among Nipponbare, 9311 and CG.**

The primers for amplifying the area inside the red line are as follow.

8117284-F: CACACTGCTCAGCCTACACA. 8117284-R: GCATCCTCATTGTGCTTCT

**Supplementary Table 1** Summary of the paired-end sequencing results.

| Sample | Clean Reads | Clean Bases (bp) | Clean Q30 | GC content (%) | Coverage at least 1X (%) | Average depth |
|--------|-------------|------------------|-----------|----------------|--------------------------|---------------|
| CG     | 34,835,652  | 5,225,347,800    | 90.17     | 44.36          | 92.70                    | 13.51×        |
| 9311   | 31,949,878  | 4,792,481,700    | 89.85     | 47.40          | 89.34                    | 12.47×        |
| B-pool | 127,452,818 | 19,117,922,700   | 88.01     | 45.31          | 96.18                    | 46.01×        |
| S-pool | 110,758,536 | 16,613,780,400   | 88.91     | 45.87          | 96.92                    | 40.39×        |

B-pool and S-pool are formed by mixing the same amounts of DNA from 50 big grain plants and 50 small grain plants, respectively.

**Supplementary Table 2** QTLs detected for grain-related traits in the F<sub>2</sub> population at three environments.

| Traits | QTL            | Chromosome | Marker interval | 15JN  |       |       |       | 18HN  |       |      |       | 19HUN |       |       |       | Candidate gene |
|--------|----------------|------------|-----------------|-------|-------|-------|-------|-------|-------|------|-------|-------|-------|-------|-------|----------------|
|        |                |            |                 | LOD   | PVE   | A     | D     | LOD   | PVE   | A    | D     | LOD   | PVE   | A     | D     |                |
| GL     | <i>qGL3.1</i>  | 3          | RM14908_RM15337 | 6.16  | 6.31  | -0.44 | -0.03 |       |       |      |       |       |       |       |       |                |
|        | <i>qGL3.2*</i> | 3          | RM15337_RM15630 | 24.22 | 22.23 | -0.81 | 0.13  | 18.15 | 53.61 | 0.97 | 0.21  | 33.96 | 43.56 | 1.08  | -0.02 | <i>OsPPKL1</i> |
|        | <i>qGL3.3</i>  | 3          | RM3684_RM16200  |       |       |       |       |       |       |      |       | 16.37 | 15.13 | 0.54  | -0.30 | <i>GL3.3</i>   |
|        | <i>qGL3.4*</i> | 3          | RM16200_RM7389  | 16.37 | 12.11 | -0.56 | -0.06 | 5.87  | 11.17 | 0.42 | -0.23 |       |       |       |       | <i>GL3.3</i>   |
| GW     | <i>qGW2.1*</i> | 2          | RM12674_RM12857 | 12.88 | 9.82  | -0.17 | -0.06 |       |       |      |       | 19.03 | 14.73 | 0.18  | -0.02 | <i>GW2</i>     |
|        | <i>qGW2.2</i>  | 2          | RM12857_RM3501  |       |       |       |       | 22.46 | 48.61 | 0.33 | -0.02 |       |       |       |       | <i>GW2</i>     |
|        | <i>qGW2.3*</i> | 2          | RM3501_RM6374   | 13.30 | 10.28 | -0.17 | -0.02 |       |       |      |       | 19.40 | 15.01 | 0.17  | -0.10 |                |
|        | <i>qGW2.4</i>  | 2          | RM13583-RM526   |       |       |       |       |       |       |      |       | 5.50  | 3.43  | -0.08 | -0.01 |                |
|        | <i>qGW3.1</i>  | 3          | RM5639-RM15337  |       |       |       |       |       |       |      |       | 13.09 | 18.72 | 0.20  | -0.03 |                |
|        | <i>qGW4.1</i>  | 4          | RM303_RM6365    | 3.34  | 5.51  | 0.15  | 0.06  |       |       |      |       |       |       |       |       |                |
|        | <i>qGW5.1*</i> | 5          | RM17726_RM5874  | 11.66 | 14.44 | -0.20 | -0.07 |       |       |      |       | 23.27 | 19.35 | 0.17  | -0.03 | <i>GS5</i>     |
|        | <i>qGW5.2*</i> | 5          | RM17954_RM18107 | 10.34 | 9.82  | -0.16 | -0.03 | 13.41 | 25.28 | 0.27 | 0.01  |       |       |       |       | <i>GW5</i>     |

[illegible]

|                  |   |                 |      |      |       |       |      |      |      |       |            |
|------------------|---|-----------------|------|------|-------|-------|------|------|------|-------|------------|
| <i>qTGW5.1</i> * | 5 | RM17726_RM5874  | 9.06 | 6.17 | -2.36 | 0.28  | 8.20 | 7.94 | 2.73 | -1.25 | <i>GS5</i> |
| <i>qTGW8.1</i>   | 8 | RM23121_RM23156 | 3.39 | 2.35 | -0.67 | -1.97 |      |      |      |       |            |
| <i>qTGW9.1</i>   | 9 | RM553_RM107     | 5.08 | 3.55 | 2.03  | 0.19  |      |      |      |       |            |

QTLs identified are named with trait abbreviations followed by the chromosome number;

LOD, log<sub>10</sub> of odds ratio;

PVE, percentage of phenotypic variance explained by a single QTL; A, additive effect; D, dominant effect;

\* indicates a locus detected in more than one environment.

**Supplementary Table 3** Functional annotation of the 39 gene models as harbored in the candidate interval.

|   | Gene Model ID | Variant              | *Position         | variation information               | Functional annotation                                                                         |
|---|---------------|----------------------|-------------------|-------------------------------------|-----------------------------------------------------------------------------------------------|
| 1 | Os02g0203300  | frameshift insertion | 2:5775769-5775769 | exon1:c.2_3insGA:p.M1fs,            | Similar to UDP-glycosyltransferase UGT75E3                                                    |
| 2 | Os02g0195800  | nonsynonymous        | 2:5353652         | exon3:c.G277C:p.E93Q,               | Similar to Chaperone protein dnaJ 6 (AtJ6) (AtDjC6)                                           |
| 3 | Os02g0196600  | nonsynonymous        | 2:5409481         | exon7:c.A2112G:p.I704M,             | Heavy metal PIB-type ATPase, Cu-transporting ATPase, Control of Cu accumulation in rice grain |
| 4 | Os02g0196750  | nonsynonymous        | 2:5413676         | exon1:c.G37A:p.D13N,                | Hypothetical protein                                                                          |
| 5 | Os02g0196700  | nonsynonymous        | 2:5413676         | exon3:c.C1327T:p.R443C,             | Similar to Exopolygalacturonase                                                               |
| 6 |               | frameshift insertion | 2:5413729-5413729 | exon3:c.1380_1381insCTAT:p.I460fs,  |                                                                                               |
| 7 | Os02g0196800  | nonsynonymous        | 2:5417345         | exon5:c.G508A:p.V170I,              | Similar to Fumarylacetoacetase (Fragment)                                                     |
|   |               | nonsynonymous        | 2:5451856         | exon1:c.C1304T:p.P435L,             |                                                                                               |
|   |               | nonsynonymous        | 2:5452717         | exon1:c.C443T:p.A148V,              |                                                                                               |
|   |               | nonsynonymous        | 2:5452733         | exon1:c.C427T:p.P143s,              |                                                                                               |
| 8 | Os02g0197300  | nonsynonymous        | 2:5452766         | exon1:c.T394A:p.s132T,              | Similar to Monoculm1                                                                          |
|   |               | frameshift insertion | 2:5452776-5452776 | exon1:c.383_384insCGGAGAC:p.V128fs, |                                                                                               |
|   |               | nonsynonymous        | 2:5452842         | exon1:c.C318A:p.F106L,              |                                                                                               |
|   |               | nonsynonymous        | 2:5452883         | exon1:c.G277A:p.D93N,               |                                                                                               |

|    |              |                      |                   |                                    |                                                                                                                                                                                                         |
|----|--------------|----------------------|-------------------|------------------------------------|---------------------------------------------------------------------------------------------------------------------------------------------------------------------------------------------------------|
|    |              | nonsynonymous        | 2:5452976         | exon1:c.G184C:p.A62P,              |                                                                                                                                                                                                         |
|    |              | nonsynonymous        | 2:5452987         | exon1:c.G173T:p.G58V,              |                                                                                                                                                                                                         |
| 9  | Os02g0197500 | nonsynonymous        | 2:5466966         | exon2:c.A449G:p.K150R,             | Regulator of chromosome condensation, RCC1 domain containing protein                                                                                                                                    |
| 10 | Os02g0197700 | nonsynonymous        | 2:5472501         | exon4:c.C590T:p.A197V,             | Di-trans-poly-cis-decaprenylcistransferase-like domain containing protein                                                                                                                               |
|    |              | nonsynonymous        | 2:5472555         | exon4:c.T536C:p.V179A,             |                                                                                                                                                                                                         |
|    |              | nonsynonymous        | 2:5482860         | exon1:c.C302T:p.P101L,             |                                                                                                                                                                                                         |
| 11 | Os02g0197950 | frameshift insertion | 2:5483025-5483025 | exon1:c.136_137insC:p.H46fs,       | Hypothetical protein                                                                                                                                                                                    |
|    |              | nonsynonymous        | 2:5483091         | exon1:c.A71T:p.D24V,               |                                                                                                                                                                                                         |
|    |              | nonsynonymous        | 2:5483103         | exon1:c.A59G:p.H20R,               |                                                                                                                                                                                                         |
| 12 | Os02g0197900 | nonsynonymous        | 2:5488374         | exon10:c.T877C:p.s293P,            | Conserved hypothetical protein                                                                                                                                                                          |
|    |              | frameshift deletion  | 2:5490692-5490704 | exon1:c.1110_1122del:p.370_374del, |                                                                                                                                                                                                         |
| 13 | Os02g0198000 | nonsynonymous        | 2:5491050         | exon1:c.C764T:p.A255V,             | Protein of unknown function DUF1677, Oryza sativa family protein                                                                                                                                        |
|    |              | nonsynonymous        | 2:5491168         | exon1:c.C646A:p.L216I,             |                                                                                                                                                                                                         |
| 14 | Os02g0198200 | nonsynonymous        | 2:5502183         | exon1:c.A10G:p.I4V,                | EF-Hand type domain containing protein                                                                                                                                                                  |
| 15 | Os02g0198300 | nonsynonymous        | 2:5506787         | exon4:c.A280G:p.T94A,              | ARF GTPase-activating protein GIT2 (G protein-coupled receptor kinase- interactor 2) (GRK-interacting protein 2) (Cool-interacting tyrosine- phosphorylated protein 2) (CAT2) (CAT-2). Splice isoform 2 |
| 16 | Os02g0198400 | nonsynonymous        | 2:5517605         | exon1:c.T315A:p.D105E,             | Similar to predicted protein                                                                                                                                                                            |
| 17 | Os02g0198600 | nonsynonymous        | 2:5528025         | exon14:c.C1076A:p.P359H,           | Similar to DNA-damage inducible protein DDI1-like                                                                                                                                                       |
| 18 | Os02g0198700 | nonsynonymous        | 2:5530585         | exon7:c.A1999C:p.s667R,            | Similar to Subtilisin-like protease                                                                                                                                                                     |
| 19 | Os02g0198800 | frameshift insertion | 2:5548358-5548358 | exon2:c.32_33insGATC:p.L11fs,      | Protein of unknown function DUF868, plant domain containing protein                                                                                                                                     |
| 20 | Os02g0199200 | nonsynonymous        | 2:5566578         | exon1:c.A506G:p.N169s,             | Disease resistance protein domain containing protein                                                                                                                                                    |
|    |              | nonsynonymous        | 2:5567498         | exon1:c.T1426C:p.C476R,            |                                                                                                                                                                                                         |
| 21 | Os02g0199300 | nonsynonymous        | 2:5568434         | exon7:c.G520A:p.G174s,             | Peptidyl-prolyl cis-trans isomerase, FKBP-type domain containing protein                                                                                                                                |

|    |              |               |           |                         |                                                                                               |
|----|--------------|---------------|-----------|-------------------------|-----------------------------------------------------------------------------------------------|
| 22 | Os02g0199500 | nonsynonymous | 2:5575260 | exon1:c.C554T:p.T185M,  | Cyclin-like F-box domain containing protein                                                   |
| 23 | Os02g0199600 | nonsynonymous | 2:5577009 | exon1:c.G113A:p.R38H,   | Similar to F-box domain containing protein                                                    |
|    |              | nonsynonymous | 2:5577085 | exon1:c.T37G:p.C13G,    |                                                                                               |
|    |              | nonsynonymous | 2:5591267 | exon2:c.C1685T:p.T562I, |                                                                                               |
|    |              | nonsynonymous | 2:5593475 | exon1:c.A101C:p.Q34P,   |                                                                                               |
| 24 | Os02g0199800 | nonsynonymous | 2:5624166 | exon1:c.G214A:p.A72T,   | Similar to No pollen                                                                          |
|    |              | nonsynonymous | 2:5624402 | exon2:c.T371C:p.I124T,  |                                                                                               |
|    |              | nonsynonymous | 2:5626683 | exon7:c.G858T:p.E286D,  |                                                                                               |
|    |              | nonsynonymous | 2:5626810 | exon7:c.C985T:p.L329F,  |                                                                                               |
|    |              | nonsynonymous | 2:5629194 | exon3:c.C1255A:p.L419I, |                                                                                               |
|    |              | nonsynonymous | 2:5629383 | exon3:c.G1066C:p.G356R, |                                                                                               |
| 25 | Os02g0200900 | nonsynonymous | 2:5629502 | exon3:c.A947G:p.Q316R,  | Hypothetical conserved gene                                                                   |
|    |              | nonsynonymous | 2:5629908 | exon3:c.T541G:p.L181V,  |                                                                                               |
|    |              | nonsynonymous | 2:5630009 | exon3:c.G440T:p.R147L,  |                                                                                               |
| 26 | Os02g0201000 | nonsynonymous | 2:5641945 | exon3:c.G464T:p.R155L,  | Conserved hypothetical protein                                                                |
| 27 | Os02g0201300 | nonsynonymous | 2:5654836 | exon2:c.G410A:p.C137Y,  | Conserved hypothetical protein                                                                |
|    |              | nonsynonymous | 2:5654846 | exon2:c.A400G:p.T134A,  |                                                                                               |
|    |              | nonsynonymous | 2:5665924 | exon3:c.T995C:p.I332T,  |                                                                                               |
| 28 | Os02g0201500 | nonsynonymous | 2:5667228 | exon2:c.T532G:p.C178G,  | Conserved hypothetical protein                                                                |
|    |              | nonsynonymous | 2:5667245 | exon2:c.A515G:p.E172G,  |                                                                                               |
|    |              | nonsynonymous | 2:5668125 | exon1:c.C101T:p.A34V,   |                                                                                               |
|    |              | nonsynonymous | 2:5684065 | exon1:c.T188C:p.V63A,   |                                                                                               |
| 29 | Os02g0201800 | nonsynonymous | 2:5684072 | exon1:c.G181A:p.E61K,   | Hypothetical gene                                                                             |
|    |              | nonsynonymous | 2:5684104 | exon1:c.T149C:p.I50T,   |                                                                                               |
| 30 | Os02g0202000 | nonsynonymous | 2:5688770 | exon1:c.C73T:p.R25C,    | Ethylene response factor, Transcription factor, Regulation of wax synthesis, Drought toleranc |
|    |              | nonsynonymous | 2:5688849 | exon1:c.A152C:p.K51T,   |                                                                                               |

|    |              |                      |                   |                               |                                                                          |
|----|--------------|----------------------|-------------------|-------------------------------|--------------------------------------------------------------------------|
| 31 | Os02g0202250 | nonsynonymous        | 2:5689207         | exon2:c.A389G:p.Q130R,        | Hypothetical conserved gene                                              |
|    |              | nonsynonymous        | 2:5710011         | exon30:c.G3630A:p.M1210I,     |                                                                          |
|    |              | nonsynonymous        | 2:5713568         | exon25:c.C3068G:p.A1023G,     |                                                                          |
|    |              | nonsynonymous        | 2:5716535         | exon22:c.G2675A:p.R892Q,      |                                                                          |
|    |              | nonsynonymous        | 2:5721529         | exon6:c.C818T:p.A273V,        |                                                                          |
| 32 | Os02g0202300 | nonsynonymous        | 2:5728655         | exon9:c.A1097T:p.Q366L,       | Protein of unknown function DUF3414 domain containing protein            |
| 33 | Os02g0202400 | frameshift insertion | 2:5737174-5737174 | exon1:c.397_398insG:p.S133fs, | ADP-glucose transporter, Plastidic translocator, Starch synthesis during |
| 34 | Os02g0202600 | nonsynonymous        | 2:5737523         | exon2:c.G670A:p.V224I,        | seed developmen                                                          |
|    |              | nonsynonymous        | 2:5747710         | exon2:c.A130C:p.M44L,         | Tetratricopeptide-like helical domain containing protein                 |
|    |              | nonsynonymous        | 2:5751103         | exon3:c.C1964T:p.A655V,       |                                                                          |
|    |              | nonsynonymous        | 2:5752051         | exon2:c.T1097C:p.L366s,       |                                                                          |
|    |              | nonsynonymous        | 2:5752123         | exon2:c.C1025T:p.T342M,       |                                                                          |
| 35 | Os02g0202800 | nonsynonymous        | 2:5752391         | exon2:c.G757A:p.E253K,        | FAR1 domain containing protein                                           |
|    |              | nonsynonymous        | 2:5752638         | exon2:c.G510C:p.K170N,        |                                                                          |
|    |              | nonsynonymous        | 2:5752681         | exon2:c.G467A:p.R156Q,        |                                                                          |
|    |              | nonsynonymous        | 2:5753501         | exon1:c.G29C:p.W10s,          |                                                                          |
|    |              | nonsynonymous        | 2:5755777         | exon2:c.C905A:p.A302E,        |                                                                          |
| 36 | Os02g0202900 | nonsynonymous        | 2:5756230         | exon2:c.T452G:p.L151R,        | Similar to ring canal kelch                                              |
|    |              | nonsynonymous        | 2:5756274         | exon2:c.C408A:p.D136E,        |                                                                          |
|    |              | nonsynonymous        | 2:5760071         | exon1:c.G425A:p.s142N,        |                                                                          |
|    |              | nonsynonymous        | 2:5760099         | exon1:c.A397G:p.s133G,        |                                                                          |
|    |              | nonsynonymous        | 2:5760143         | exon1:c.T353C:p.M118T,        |                                                                          |
| 37 | Os02g0202950 | nonsynonymous        | 2:5760173         | exon1:c.T323C:p.L108P,        | Similar to OSIGBa0125M19.6 protein                                       |
|    |              | nonsynonymous        | 2:5760413         | exon1:c.T83C:p.L28P,          |                                                                          |
|    |              | nonsynonymous        | 2:5760432         | exon1:c.G64A:p.G22R,          |                                                                          |
| 38 | Os02g0203200 | nonsynonymous        | 2:5777250         | exon1:c.C55A:p.R19s,          | Hypothetical protein                                                     |

|    |              |                      |                   |                          |                                            |
|----|--------------|----------------------|-------------------|--------------------------|--------------------------------------------|
| 39 | Os02g0203300 | nonsynonymous        | 2:5777288         | exon1:c.A17G:p.H6R,      | Similar to UDP-glycosyltransferase UGT75E3 |
|    |              | frameshift insertion | 2:5775769-5775770 | exon1:c.2_3insGA:p.M1fs, |                                            |
|    |              | nonsynonymous        | 2:5777288         | exon2:c.T1421C:p.V474A,  |                                            |

\*Position as according to the *Oryza sativa* Japonica reference genome IRGSP-1.0.

**Supplementary Table 4** All splicing sites detected from the whole-genome sequencing results.

|    | Gene name                                                             | variation type | chromosome | *position | reference | variation |
|----|-----------------------------------------------------------------------|----------------|------------|-----------|-----------|-----------|
| 1  | OS01T0116900-00(PAC:OS01T0116900-00:exon2:c.475+2T>C)                 | splicing       | 1          | 939436    | T         | C         |
| 2  | OS01T0136900-00(PAC:OS01T0136900-00:exon4:c.1564-2A>C)                | splicing       | 1          | 1986137   | A         | C         |
| 3  | OS01T0136900-00(PAC:OS01T0136900-00:exon4:c.1564-1G>A)                | splicing       | 1          | 1986138   | G         | A         |
| 4  | OS01T0186950-00;OS01T0186900-01(PAC:OS01T0186900-01:exon2:c.774-1T>A) | splicing       | 1          | 4647828   | T         | A         |
| 5  | OS01T0187300-01(PAC:OS01T0187300-01:exon1:c.56+1G>A)                  | splicing       | 1          | 4668371   | G         | A         |
| 6  | OS01T0197200-01(PAC:OS01T0197200-01:exon11:c.1438-1C>T)               | splicing       | 1          | 5247612   | G         | A         |
| 7  | OS01T0205100-01(PAC:OS01T0205100-01:exon9:c.908+2T>C)                 | splicing       | 1          | 5763635   | T         | C         |
| 8  | OS01T0226666-00;OS01T0226700-01(PAC:OS01T0226700-01:exon2:c.407-1C>G) | splicing       | 1          | 7009914   | C         | G         |
| 9  | OS01T0328300-02(PAC:OS01T0328300-02:exon2:c.548+1A>G)                 | splicing       | 1          | 12639698  | T         | C         |
| 10 | OS01T0354200-01(PAC:OS01T0354200-01:exon14:c.957-2A>G)                | splicing       | 1          | 14225180  | T         | C         |
| 11 | OS01T0364900-01(PAC:OS01T0364900-01:exon2:c.231-1G>A)                 | splicing       | 1          | 14902433  | G         | A         |
| 12 | OS01T0383700-01(PAC:OS01T0383700-01:exon1:c.358+2T>A)                 | splicing       | 1          | 16048474  | T         | A         |
| 13 | OS01T0520600-01(PAC:OS01T0520600-01:exon3:c.2545+1G>A)                | splicing       | 1          | 18537375  | C         | T         |
| 14 | OS01T0550900-00;OS01T0550950-00(PAC:OS01T0550950-00:exon3:c.236-1T>C) | splicing       | 1          | 20653594  | A         | G         |
| 15 | OS01T0653800-02(PAC:OS01T0653800-02:exon18:c.2655-1G>A)               | splicing       | 1          | 26456531  | C         | T         |
| 16 | OS01T0681200-02(PAC:OS01T0681200-02:exon18:c.1842+2T>C)               | splicing       | 1          | 28062450  | A         | G         |
| 17 | OS01T0706100-01(PAC:OS01T0706100-01:exon2:c.1167+1G>T)                | splicing       | 1          | 29286833  | G         | T         |
| 18 | OS01T0756101-00(PAC:OS01T0756101-00:exon3:c.475-1G>A)                 | splicing       | 1          | 31724587  | C         | T         |



|    |                                                         |          |   |          |   |   |
|----|---------------------------------------------------------|----------|---|----------|---|---|
| 19 | OS01T0757800-01(PAC:OS01T0757800-01:exon5:c.478-2A>T)   | splicing | 1 | 31831267 | A | T |
| 20 | OS01T0757800-01(PAC:OS01T0757800-01:exon5:c.478-1G>T)   | splicing | 1 | 31831268 | G | T |
| 21 | OS01T0804150-00(PAC:OS01T0804150-00:exon1:c.315+1G>C)   | splicing | 1 | 34113228 | G | C |
| 22 | OS01T0805700-01(PAC:OS01T0805700-01:exon11:c.1287+2T>C) | splicing | 1 | 34154723 | A | G |
| 23 | OS01T0838100-01(PAC:OS01T0838100-01:exon8:c.677-1G>T)   | splicing | 1 | 35946060 | G | T |
| 24 | OS01T0921400-01(PAC:OS01T0921400-01:exon1:c.339+2G>A)   | splicing | 1 | 40235589 | G | A |
| 25 | OS01T0946800-00(PAC:OS01T0946800-00:exon1:c.33+1G>A)    | splicing | 1 | 41614193 | G | A |
| 26 | OS01T0956600-01(PAC:OS01T0956600-01:exon4:c.503-2A>T)   | splicing | 1 | 42153407 | A | T |
| 27 | OS01T0965000-00(PAC:OS01T0965000-00:exon11:c.2807+1G>A) | splicing | 1 | 42552557 | C | T |
| 28 | OS02T0101600-00(PAC:OS02T0101600-00:exon3:c.303-1G>A)   | splicing | 2 | 85264    | C | T |
| 29 | OS02T0115950-00(PAC:OS02T0115950-00:exon3:c.280+2C>T)   | splicing | 2 | 839986   | C | T |
| 30 | OS02T0146700-02(PAC:OS02T0146700-02:exon3:c.228-2A>T)   | splicing | 2 | 2564375  | A | T |
| 31 | OS02T0146700-02(PAC:OS02T0146700-02:exon7:c.523-1G>C)   | splicing | 2 | 2566027  | G | C |
| 32 | OS02T0146700-02(PAC:OS02T0146700-02:exon8:c.589-2A>C)   | splicing | 2 | 2566237  | A | C |
| 33 | OS02T0146700-02(PAC:OS02T0146700-02:exon9:c.628-2A>T)   | splicing | 2 | 2566375  | A | T |
| 34 | OS02T0146700-02(PAC:OS02T0146700-02:exon22:c.2336+1G>A) | splicing | 2 | 2570135  | G | A |
| 35 | OS02T0159700-01(PAC:OS02T0159700-01:exon3:c.204+1G>C)   | splicing | 2 | 3232811  | C | G |
| 36 | OS02T0164000-00(PAC:OS02T0164000-00:exon16:c.2202+2T>C) | splicing | 2 | 3442777  | A | G |
| 37 | OS02T0221300-01(PAC:OS02T0221300-01:exon1:c.1051+2T>C)  | splicing | 2 | 6775095  | T | C |
| 38 | OS02T0222000-00(PAC:OS02T0222000-00:exon3:c.1189-1G>A)  | splicing | 2 | 6804733  | G | A |
| 39 | OS02T0238500-01(PAC:OS02T0238500-01:exon2:c.255+1G>A)   | splicing | 2 | 7851921  | C | T |
| 40 | OS02T0327100-01(PAC:OS02T0327100-01:exon3:c.176+1G>A)   | splicing | 2 | 13182999 | C | T |
| 41 | OS02T0437901-00(PAC:OS02T0437901-00:exon4:c.407-2A>C)   | splicing | 2 | 13993220 | T | G |
| 42 | OS02T0480800-00(PAC:OS02T0480800-00:exon3:c.163-1G>A)   | splicing | 2 | 16533720 | G | A |
| 43 | OS02T0590700-01(PAC:OS02T0590700-01:exon2:c.177+2T>C)   | splicing | 2 | 22820485 | T | C |
| 44 | OS02T0609800-00(PAC:OS02T0609800-00:exon8:c.818+1G>A)   | splicing | 2 | 23943842 | C | T |

|    |                                                         |          |   |          |   |   |
|----|---------------------------------------------------------|----------|---|----------|---|---|
| 45 | OS02T0616100-04(PAC:OS02T0616100-04:exon1:c.986+1C>T)   | splicing | 2 | 24373831 | C | T |
| 46 | OS02T0616199-00(PAC:OS02T0616199-00:exon3:c.180-1G>T)   | splicing | 2 | 24382366 | C | A |
| 47 | OS02T0633066-00(PAC:OS02T0633066-00:exon3:c.905-2A>G)   | splicing | 2 | 25376801 | T | C |
| 48 | OS02T0635600-01(PAC:OS02T0635600-01:exon1:c.2542+2T>C)  | splicing | 2 | 25490698 | T | C |
| 49 | OS02T0643900-00(PAC:OS02T0643900-00:exon3:c.786-1G>T)   | splicing | 2 | 25889427 | G | T |
| 50 | OS02T0684150-00(PAC:OS02T0684150-00:exon3:c.711+2T>A)   | splicing | 2 | 27978341 | A | T |
| 51 | OS02T0772000-00(PAC:OS02T0772000-00:exon7:c.1035-2A>G)  | splicing | 2 | 32587188 | A | G |
| 52 | OS02T0772300-01(PAC:OS02T0772300-01:exon6:c.675-2A>G)   | splicing | 2 | 32599323 | A | G |
| 53 | OS02T0805800-01(PAC:OS02T0805800-01:exon7:c.1194+2T>C)  | splicing | 2 | 34376561 | A | G |
| 54 | OS02T0806350-00(PAC:OS02T0806350-00:exon4:c.1157-1G>A)  | splicing | 2 | 34408948 | C | T |
| 55 | OS02T0812700-00(PAC:OS02T0812700-00:exon2:c.267-2A>T)   | splicing | 2 | 34802435 | A | T |
| 56 | OS02T0816900-01(PAC:OS02T0816900-01:exon20:c.2481+1G>T) | splicing | 2 | 35036091 | G | T |
| 57 | OS02T0822450-00(PAC:OS02T0822450-00:exon2:c.228+1C>T)   | splicing | 2 | 35304525 | G | A |
| 58 | OS03T0147150-00(PAC:OS03T0147150-00:exon2:c.54+2A>G)    | splicing | 3 | 2628437  | T | C |
| 59 | OS03T0233700-00(PAC:OS03T0233700-00:exon3:c.156-2G>A)   | splicing | 3 | 7083769  | C | T |
| 60 | OS03T0325900-00(PAC:OS03T0325900-00:exon2:c.142-1G>T)   | splicing | 3 | 11879392 | G | T |
| 61 | OS03T0328900-02(PAC:OS03T0328900-02:exon3:c.1346+1C>T)  | splicing | 3 | 12048716 | C | T |
| 62 | OS03T0433733-00(PAC:OS03T0433733-00:exon3:c.127-1A>G)   | splicing | 3 | 18279701 | T | C |
| 63 | OS03T0583000-00(PAC:OS03T0583000-00:exon2:c.94+2T>A)    | splicing | 3 | 21460946 | A | T |
| 64 | OS03T0589300-01(PAC:OS03T0589300-01:exon5:c.365-1G>A)   | splicing | 3 | 21788354 | C | T |
| 65 | OS03T0682666-00(PAC:OS03T0682666-00:exon1:c.110+1T>C)   | splicing | 3 | 27188179 | T | C |
| 66 | OS03T0682666-00(PAC:OS03T0682666-00:exon1:c.110+2G>A)   | splicing | 3 | 27188180 | G | A |
| 67 | OS03T0682666-00(PAC:OS03T0682666-00:exon2:c.111-1T>C)   | splicing | 3 | 27188196 | T | C |
| 68 | OS03T0732200-01(PAC:OS03T0732200-01:exon2:c.234+1G>A)   | splicing | 3 | 29977789 | C | T |
| 69 | OS03T0745100-00(PAC:OS03T0745100-00:exon3:c.762-2G>T)   | splicing | 3 | 30610028 | C | A |
| 70 | OS03T0841800-01(PAC:OS03T0841800-01:exon4:c.306+1G>A)   | splicing | 3 | 35390422 | C | T |

|    |                                                                      |          |   |          |   |   |
|----|----------------------------------------------------------------------|----------|---|----------|---|---|
| 71 | OS04T0291000-01(PAC:OS04T0291000-01:exon2:c.167-2A>G)                | splicing | 4 | 12662563 | A | G |
| 72 | OS04T0295901-00(PAC:OS04T0295901-00:exon2:c.252-2A>G)                | splicing | 4 | 13026794 | A | G |
| 73 | OS04T0341900-00(PAC:OS04T0341900-00:exon3:c.321+1G>A)                | splicing | 4 | 16199684 | C | T |
| 74 | OS04T0367201-00(PAC:OS04T0367201-00:exon3:c.953-2A>G)                | splicing | 4 | 17816991 | T | C |
| 75 | OS04T0397901-01(PAC:OS04T0397901-01:exon4:c.251-2A>G)                | splicing | 4 | 19641680 | T | C |
| 76 | OS04T0422700-01(PAC:OS04T0422700-01:exon3:c.133-2A>G)                | splicing | 4 | 20905052 | T | C |
| 77 | OS04T0456900-00(PAC:OS04T0456900-00:exon2:c.789-1G>C)                | splicing | 4 | 22835680 | G | C |
| 78 | OS04T0480500-01(PAC:OS04T0480500-01:exon1:c.1309+1G>C)               | splicing | 4 | 24033863 | G | C |
| 79 | OS04T0493100-01(PAC:OS04T0493100-01:exon2:c.159+2T>C)                | splicing | 4 | 24656353 | A | G |
| 80 | OS04T0494950-01(PAC:OS04T0494950-01:exon3:c.584-2A>G)                | splicing | 4 | 24747863 | A | G |
| 81 | OS04T0550900-00(PAC:OS04T0550900-00:exon3:c.128-1G>A)                | splicing | 4 | 27595875 | C | T |
| 82 | OS04T0577300-01(PAC:OS04T0577300-01:exon2:c.281-2A>G)                | splicing | 4 | 29111266 | A | G |
| 83 | OS04T0582600-01(PAC:OS04T0582600-01:exon5:c.1840+2T>C)               | splicing | 4 | 29431703 | A | G |
| 84 | OS04T0582600-01(PAC:OS04T0582600-01:exon5:c.1763-1G>A)               | splicing | 4 | 29431783 | C | T |
| 85 | OS04T0594800-01;OS04T0595125-00(PAC:OS04T0595125-00:exon2:c.41+1G>C) | splicing | 4 | 30064071 | C | G |
| 86 | OS04T0602000-00(PAC:OS04T0602000-00:exon1:c.1783+1G>A)               | splicing | 4 | 30383506 | G | A |
| 87 | OS04T0612900-01(PAC:OS04T0612900-01:exon1:c.97+2T>G)                 | splicing | 4 | 31077316 | T | G |
| 88 | OS04T0621500-00(PAC:OS04T0621500-00:exon1:c.678+2T>C)                | splicing | 4 | 31578196 | T | C |
| 89 | OS04T0681500-01(PAC:OS04T0681500-01:exon5:c.700-2A>G)                | splicing | 4 | 34789494 | A | G |
| 90 | OS05T0129900-02(PAC:OS05T0129900-02:exon4:c.264+1C>T)                | splicing | 5 | 1747751  | G | A |
| 91 | OS05T0144150-00(PAC:OS05T0144150-00:exon3:c.169-2A>T)                | splicing | 5 | 2543941  | A | T |
| 92 | OS05T0189425-00(PAC:OS05T0189425-00:exon3:c.53-2A>T)                 | splicing | 5 | 5489919  | T | A |
| 93 | OS05T0199800-01(PAC:OS05T0199800-01:exon3:c.193-1T>G)                | splicing | 5 | 6207238  | T | G |
| 94 | OS05T0414400-02(PAC:OS05T0414400-02:exon5:c.335-1G>A)                | splicing | 5 | 20270131 | C | T |
| 95 | OS05T0443900-01(PAC:OS05T0443900-01:exon1:c.50+2T>C)                 | splicing | 5 | 21718953 | T | C |
| 96 | OS05T0480700-01(PAC:OS05T0480700-01:exon1:c.102+2T>A)                | splicing | 5 | 23632486 | T | A |

|     |                                                                        |          |   |          |   |   |
|-----|------------------------------------------------------------------------|----------|---|----------|---|---|
| 97  | OS05T0512500-01(PAC:OS05T0512500-01:exon3:c.91-1G>T)                   | splicing | 5 | 25395753 | C | A |
| 98  | OS05T0521500-01(PAC:OS05T0521500-01:exon2:c.159-2A>G)                  | splicing | 5 | 25943284 | A | G |
| 99  | OS05T0573200-00(PAC:OS05T0573200-00:exon1:c.49+1G>A)                   | splicing | 5 | 28547703 | G | A |
| 100 | OS06T0105400-02(PAC:OS06T0105400-02:exon20:c.1583-1G>A)                | splicing | 6 | 370569   | C | T |
| 101 | OS06T0105400-02(PAC:OS06T0105400-02:exon19:c.1490-2A>T)                | splicing | 6 | 370762   | T | A |
| 102 | OS06T0105400-02(PAC:OS06T0105400-02:exon18:c.1489+1G>A)                | splicing | 6 | 370888   | C | T |
| 103 | OS06T0105400-02(PAC:OS06T0105400-02:exon16:c.1224-1G>T)                | splicing | 6 | 371294   | C | A |
| 104 | OS06T0161100-00(PAC:OS06T0161100-00:exon2:c.742+2T>C)                  | splicing | 6 | 3095206  | T | C |
| 105 | OS06T0232700-01(PAC:OS06T0232700-01:exon2:c.519+2T>C)                  | splicing | 6 | 6898613  | T | C |
| 106 | OS06T0268500-00(PAC:OS06T0268500-00:exon2:c.2103+1G>A)                 | splicing | 6 | 8936915  | C | T |
| 107 | OS06T0310801-01;OS06T0311000-00(PAC:OS06T0311000-00:exon5:c.263-2A>C)  | splicing | 6 | 11841820 | T | G |
| 108 | OS06T0311800-00(PAC:OS06T0311800-00:exon2:c.408+2T>C)                  | splicing | 6 | 11889750 | A | G |
| 109 | OS06T0349750-00;OS06T0349700-00(PAC:OS06T0349700-00:exon5:c.1258-2A>G) | splicing | 6 | 14151281 | T | C |
| 110 | OS06T0484450-00(PAC:OS06T0484450-00:exon2:c.258+2T>C)                  | splicing | 6 | 16507688 | A | G |
| 111 | OS06T0484450-00(PAC:OS06T0484450-00:exon2:c.258+1G>A)                  | splicing | 6 | 16507689 | C | T |
| 112 | OS06T0561050-00(PAC:OS06T0561050-00:exon4:c.237+2G>C)                  | splicing | 6 | 21481237 | C | G |
| 113 | OS06T0585900-01(PAC:OS06T0585900-01:exon2:c.155+2T>C)                  | splicing | 6 | 22867298 | A | G |
| 114 | OS06T0587900-00(PAC:OS06T0587900-00:exon2:c.2074+2T>C)                 | splicing | 6 | 23050058 | A | G |
| 115 | OS06T0607200-01(PAC:OS06T0607200-01:exon7:c.304-2A>G)                  | splicing | 6 | 24144220 | T | C |
| 116 | OS06T0641500-00(PAC:OS06T0641500-00:exon2:c.744-2A>G)                  | splicing | 6 | 26093726 | A | G |
| 117 | OS06T0642500-01(PAC:OS06T0642500-01:exon1:c.93+1G>A)                   | splicing | 6 | 26155741 | G | A |
| 118 | OS06T0647200-02(PAC:OS06T0647200-02:exon6:c.2024-1G>A)                 | splicing | 6 | 26455255 | G | A |
| 119 | OS06T0696900-00(PAC:OS06T0696900-00:exon3:c.295-2A>G)                  | splicing | 6 | 29148830 | T | C |
| 120 | OS07T0201800-00(PAC:OS07T0201800-00:exon1:c.482+2T>A)                  | splicing | 7 | 5491193  | T | A |
| 121 | OS07T0208801-00(PAC:OS07T0208801-00:exon2:c.680+1G>A)                  | splicing | 7 | 5878278  | G | A |
| 122 | OS07T0252800-01(PAC:OS07T0252800-01:exon2:c.191-1G>T)                  | splicing | 7 | 8526036  | G | T |

|     |                                                                       |          |   |          |   |   |
|-----|-----------------------------------------------------------------------|----------|---|----------|---|---|
| 123 | OS07T0273000-01;OS07T0272900-01(PAC:OS07T0272900-01:exon3:c.196-1A>G) | splicing | 7 | 10115984 | T | C |
| 124 | OS07T0461550-00(PAC:OS07T0461550-00:exon1:c.287+1G>A)                 | splicing | 7 | 16192679 | G | A |
| 125 | OS07T0467900-01;OS07T0467850-00(PAC:OS07T0467850-00:exon4:c.290-2A>G) | splicing | 7 | 16660573 | T | C |
| 126 | OS07T0523100-00(PAC:OS07T0523100-00:exon2:c.4-1G>A)                   | splicing | 7 | 20257730 | G | A |
| 127 | OS07T0523100-00(PAC:OS07T0523100-00:exon3:c.258+1G>A)                 | splicing | 7 | 20258183 | G | A |
| 128 | OS07T0535800-01(PAC:OS07T0535800-01:exon4:c.1137-2C>A)                | splicing | 7 | 21047519 | C | A |
| 129 | OS07T0578333-01(PAC:OS07T0578333-01:exon3:c.32-1G>A)                  | splicing | 7 | 23401199 | C | T |
| 130 | OS07T0632600-01(PAC:OS07T0632600-01:exon19:c.1914+2T>C)               | splicing | 7 | 26239786 | T | C |
| 131 | OS07T0641600-02(PAC:OS07T0641600-02:exon8:c.638+2T>C)                 | splicing | 7 | 26702805 | A | G |
| 132 | OS07T0648233-00(PAC:OS07T0648233-00:exon1:c.993+2T>A)                 | splicing | 7 | 27066557 | T | A |
| 133 | OS07T0661300-01(PAC:OS07T0661300-01:exon6:c.1273-1G>T)                | splicing | 7 | 27887682 | G | T |
| 134 | OS08T0105600-00(PAC:OS08T0105600-00:exon3:c.322-1G>T)                 | splicing | 8 | 294544   | C | A |
| 135 | OS08T0129200-02;OS08T0129300-00(PAC:OS08T0129300-00:exon1:c.419+1G>C) | splicing | 8 | 1645684  | G | C |
| 136 | OS08T0133600-01(PAC:OS08T0133600-01:exon2:c.242-2A>T)                 | splicing | 8 | 1914623  | A | T |
| 137 | OS08T0143400-02(PAC:OS08T0143400-02:exon3:c.304-1C>T)                 | splicing | 8 | 2388708  | G | A |
| 138 | OS08T0144400-01(PAC:OS08T0144400-01:exon3:c.592+2T>C)                 | splicing | 8 | 2513745  | A | G |
| 139 | OS08T0169300-00(PAC:OS08T0169300-00:exon2:c.120-1G>T)                 | splicing | 8 | 4053675  | G | T |
| 140 | OS08T0190800-01(PAC:OS08T0190800-01:exon4:c.226+2T>C)                 | splicing | 8 | 5319168  | A | G |
| 141 | OS08T0191800-00(PAC:OS08T0191800-00:exon6:c.714+1G>A)                 | splicing | 8 | 5381997  | C | T |
| 142 | OS08T0191800-00(PAC:OS08T0191800-00:exon3:c.456+1G>C)                 | splicing | 8 | 5383178  | C | G |
| 143 | OS08T0198300-01(PAC:OS08T0198300-01:exon2:c.14-2A>T)                  | splicing | 8 | 5681862  | A | T |
| 144 | OS08T0229601-01;OS08T0229500-01(PAC:OS08T0229500-01:exon2:c.77+2A>G)  | splicing | 8 | 7893187  | T | C |
| 145 | OS08T0290900-01(PAC:OS08T0290900-01:exon3:c.191+1G>A)                 | splicing | 8 | 11631139 | G | A |
| 146 | OS08T0376700-01(PAC:OS08T0376700-01:exon4:c.214-1G>T)                 | splicing | 8 | 17678429 | G | T |
| 147 | OS08T0402700-01(PAC:OS08T0402700-01:exon1:c.47+2T>C)                  | splicing | 8 | 19220614 | T | C |
| 148 | OS08T0416100-01(PAC:OS08T0416100-01:exon4:c.1644+2T>C)                | splicing | 8 | 19905228 | A | G |

|     |                                                                      |          |    |          |   |   |
|-----|----------------------------------------------------------------------|----------|----|----------|---|---|
| 149 | OS08T0436100-01(PAC:OS08T0436100-01:exon3:c.706-1G>C)                | splicing | 8  | 21191398 | G | C |
| 150 | OS08T0436100-01(PAC:OS08T0436100-01:exon3:c.813+2T>C)                | splicing | 8  | 21191508 | T | C |
| 151 | OS08T0451400-01(PAC:OS08T0451400-01:exon5:c.412-1G>T)                | splicing | 8  | 22044546 | C | A |
| 152 | OS08T0485300-00(PAC:OS08T0485300-00:exon1:c.202+2T>C)                | splicing | 8  | 23984129 | T | C |
| 153 | OS08T0503200-01;OS08T0503400-00(PAC:OS08T0503400-00:exon2:c.21+1G>A) | splicing | 8  | 24868023 | C | T |
| 154 | OS09T0265225-00(PAC:OS09T0265225-00:exon2:c.53+1G>T)                 | splicing | 9  | 4935615  | C | A |
| 155 | OS09T0268401-00(PAC:OS09T0268401-00:exon2:c.426+2T>G)                | splicing | 9  | 5140134  | A | C |
| 156 | OS09T0268600-01(PAC:OS09T0268600-01:exon4:c.981-2G>T)                | splicing | 9  | 5150701  | C | A |
| 157 | OS09T0331801-00(PAC:OS09T0331801-00:exon1:c.124+1G>A)                | splicing | 9  | 9918781  | G | A |
| 158 | OS09T0348600-00(PAC:OS09T0348600-00:exon6:c.1457-1G>A)               | splicing | 9  | 10964829 | G | A |
| 159 | OS09T0365000-00(PAC:OS09T0365000-00:exon2:c.1313+1G>C)               | splicing | 9  | 11992115 | C | G |
| 160 | OS09T0495000-00(PAC:OS09T0495000-00:exon3:c.413-2A>T)                | splicing | 9  | 19175978 | A | T |
| 161 | OS09T0539400-00(PAC:OS09T0539400-00:exon7:c.1027+1G>C)               | splicing | 9  | 21241890 | G | C |
| 162 | OS09T0540600-01(PAC:OS09T0540600-01:exon4:c.894-2A>C)                | splicing | 9  | 21279481 | A | C |
| 163 | OS09T0553200-01(PAC:OS09T0553200-01:exon7:c.489+2T>C)                | splicing | 9  | 21919424 | T | C |
| 164 | OS09T0562200-00(PAC:OS09T0562200-00:exon1:c.424+2A>G)                | splicing | 9  | 22333116 | A | G |
| 165 | OS09T0567366-01(PAC:OS09T0567366-01:exon3:c.393-1G>A)                | splicing | 9  | 22650080 | G | A |
| 166 | OS10T0105850-00(PAC:OS10T0105850-00:exon3:c.445-1G>A)                | splicing | 10 | 432936   | C | T |
| 167 | OS10T0115500-00(PAC:OS10T0115500-00:exon3:c.142+1G>A)                | splicing | 10 | 1001940  | C | T |
| 168 | OS10T0118000-01(PAC:OS10T0118000-01:exon2:c.286+2T>C)                | splicing | 10 | 1141117  | A | G |
| 169 | OS10T0134033-00(PAC:OS10T0134033-00:exon1:c.313+1G>A)                | splicing | 10 | 2119222  | G | A |
| 170 | OS10T0187701-00(PAC:OS10T0187701-00:exon2:c.818+1G>A)                | splicing | 10 | 6026716  | G | A |
| 171 | OS10T0187701-00(PAC:OS10T0187701-00:exon3:c.819-2A>G)                | splicing | 10 | 6027164  | A | G |
| 172 | OS10T0326800-01(PAC:OS10T0326800-01:exon2:c.92-2A>C)                 | splicing | 10 | 9078897  | A | C |
| 173 | OS10T0335200-02(PAC:OS10T0335200-02:exon1:c.259+1G>A)                | splicing | 10 | 9625071  | G | A |
| 174 | OS10T0338500-01(PAC:OS10T0338500-01:exon1:c.112+2T>C)                | splicing | 10 | 9830963  | T | C |

|     |                                                                       |          |    |          |   |   |
|-----|-----------------------------------------------------------------------|----------|----|----------|---|---|
| 175 | OS10T0388500-01(PAC:OS10T0388500-01:exon5:c.509-1G>A)                 | splicing | 10 | 12836427 | G | A |
| 176 | OS10T0388500-01(PAC:OS10T0388500-01:exon8:c.905-1G>A)                 | splicing | 10 | 12837091 | G | A |
| 177 | OS10T0390600-01(PAC:OS10T0390600-01:exon7:c.361-2G>T)                 | splicing | 10 | 12978910 | G | T |
| 178 | OS10T0397500-00(PAC:OS10T0397500-00:exon1:c.251+1G>C)                 | splicing | 10 | 13375630 | G | C |
| 179 | OS10T0474300-00(PAC:OS10T0474300-00:exon4:c.637+2T>C)                 | splicing | 10 | 17648679 | A | G |
| 180 | OS10T0487500-01(PAC:OS10T0487500-01:exon1:c.328+1G>A)                 | splicing | 10 | 18446479 | G | A |
| 181 | OS10T0494200-00(PAC:OS10T0494200-00:exon9:c.785+2T>A)                 | splicing | 10 | 18775927 | T | A |
| 182 | OS10T0497300-01;OS10T0497200-00(PAC:OS10T0497200-00:exon2:c.580+2T>C) | splicing | 10 | 18935883 | A | G |
| 183 | OS10T0527900-01(PAC:OS10T0527900-01:exon3:c.1379-2A>T)                | splicing | 10 | 20539039 | T | A |
| 184 | OS10T0574500-00(PAC:OS10T0574500-00:exon2:c.612+1G>A)                 | splicing | 10 | 22822141 | C | T |
| 185 | OS10T0580500-00(PAC:OS10T0580500-00:exon5:c.250+1A>G)                 | splicing | 10 | 23162222 | T | C |
| 186 | OS11T0138600-00(PAC:OS11T0138600-00:exon3:c.119-1G>T)                 | splicing | 11 | 1799858  | C | A |
| 187 | OS11T0141000-01(PAC:OS11T0141000-01:exon3:c.234+2T>G)                 | splicing | 11 | 1895242  | T | G |
| 188 | OS11T0173432-00(PAC:OS11T0173432-00:exon3:c.3649+2T>C)                | splicing | 11 | 3631498  | T | C |
| 189 | OS11T0208100-01(PAC:OS11T0208100-01:exon3:c.907-2A>G)                 | splicing | 11 | 5532850  | T | C |
| 190 | OS11T0208100-01(PAC:OS11T0208100-01:exon2:c.906+2T>C)                 | splicing | 11 | 5533095  | A | G |
| 191 | OS11T0212300-00(PAC:OS11T0212300-00:exon4:c.593+2T>G)                 | splicing | 11 | 5839795  | A | C |
| 192 | OS11T0212300-00(PAC:OS11T0212300-00:exon3:c.364+2T>C)                 | splicing | 11 | 5840138  | A | G |
| 193 | OS11T0256600-00(PAC:OS11T0256600-00:exon3:c.496-1G>A)                 | splicing | 11 | 8458415  | G | A |
| 194 | OS11T0284032-00(PAC:OS11T0284032-00:exon1:c.51+1G>A)                  | splicing | 11 | 10185437 | G | A |
| 195 | OS11T0291000-00(PAC:OS11T0291000-00:exon2:c.639+1G>A)                 | splicing | 11 | 10582260 | C | T |
| 196 | OS11T0471300-01;OS11T0471200-01(PAC:OS11T0471200-01:exon4:c.408+2T>C) | splicing | 11 | 16207923 | A | G |
| 197 | OS11T0485900-01(PAC:OS11T0485900-01:exon3:c.83-2A>G)                  | splicing | 11 | 17131688 | T | C |
| 198 | OS11T0506300-00(PAC:OS11T0506300-00:exon5:c.577-2A>T)                 | splicing | 11 | 18044692 | T | A |
| 199 | OS11T0517800-00(PAC:OS11T0517800-00:exon8:c.841-1G>A)                 | splicing | 11 | 18567060 | C | T |
| 200 | OS11T0586200-00(PAC:OS11T0586200-00:exon4:c.326+1G>A)                 | splicing | 11 | 22173973 | C | T |

|     |                                                                       |          |    |          |   |   |
|-----|-----------------------------------------------------------------------|----------|----|----------|---|---|
| 201 | OS11T0603200-01(PAC:OS11T0603200-01:exon3:c.1165-1G>T)                | splicing | 11 | 23231672 | G | T |
| 202 | OS11T0614500-02(PAC:OS11T0614500-02:exon3:c.360-2A>T)                 | splicing | 11 | 23858851 | A | T |
| 203 | OS11T0635400-00(PAC:OS11T0635400-00:exon2:c.128+1G>A)                 | splicing | 11 | 25022823 | C | T |
| 204 | OS11T0648000-01(PAC:OS11T0648000-01:exon9:c.902+2T>C)                 | splicing | 11 | 25770174 | A | G |
| 205 | OS11T0668300-00(PAC:OS11T0668300-00:exon10:c.1606+1G>A)               | splicing | 11 | 26976705 | G | A |
| 206 | OS11T0669200-00(PAC:OS11T0669200-00:exon5:c.702+1G>T)                 | splicing | 11 | 27026110 | G | T |
| 207 | OS11T0669200-00(PAC:OS11T0669200-00:exon9:c.1321-1G>A)                | splicing | 11 | 27027370 | G | A |
| 208 | OS11T0691100-00;OS11T0691050-00(PAC:OS11T0691050-00:exon3:c.191-1G>A) | splicing | 11 | 28121065 | C | T |
| 209 | OS12T0110400-01(PAC:OS12T0110400-01:exon3:c.516+2T>C)                 | splicing | 12 | 563925   | T | C |
| 210 | OS12T0112800-00(PAC:OS12T0112800-00:exon2:c.270+2T>C)                 | splicing | 12 | 658148   | T | C |
| 211 | OS12T0119600-00(PAC:OS12T0119600-00:exon2:c.171-2A>G)                 | splicing | 12 | 936898   | A | G |
| 212 | OS12T0131701-00(PAC:OS12T0131701-00:exon2:c.220-2A>C)                 | splicing | 12 | 1524037  | A | C |
| 213 | OS12T0131701-00(PAC:OS12T0131701-00:exon3:c.697+1G>A)                 | splicing | 12 | 1524691  | G | A |
| 214 | OS12T0131701-00(PAC:OS12T0131701-00:exon4:c.698-2A>C)                 | splicing | 12 | 1525051  | A | C |
| 215 | OS12T0246700-01(PAC:OS12T0246700-01:exon2:c.2798-1G>A)                | splicing | 12 | 8164981  | G | A |
| 216 | OS12T0254825-00(PAC:OS12T0254825-00:exon1:c.378+2T>C)                 | splicing | 12 | 8691212  | T | C |
| 217 | OS12T0289833-01(PAC:OS12T0289833-01:exon3:c.261-1G>A)                 | splicing | 12 | 11178108 | C | T |
| 218 | OS12T0480100-01(PAC:OS12T0480100-01:exon3:c.274-1G>T)                 | splicing | 12 | 17625030 | G | T |
| 219 | OS12T0539700-01(PAC:OS12T0539700-01:exon4:c.1487-2A>G)                | splicing | 12 | 21564605 | A | G |
| 220 | OS12T0539751-00(PAC:OS12T0539751-00:exon4:c.413+2T>C)                 | splicing | 12 | 21569215 | T | C |
| 221 | OS12T0541000-01(PAC:OS12T0541000-01:exon1:c.894+2T>C)                 | splicing | 12 | 21638087 | T | C |
| 222 | OS12T0584700-01(PAC:OS12T0584700-01:exon3:c.127-2A>G)                 | splicing | 12 | 24329451 | T | C |

---

\*Position as according to the *Oryza sativa* Japonica reference genome IRGSP-1.0.
